1 CellDeathPred: A Deep Learning framework for Ferroptosis and Apoptosis prediction based  
2 on cell painting

3

4 Kenji Schorpp<sup>1,#</sup>, Alaa Bessadok<sup>2,#</sup>, Aidin Biibosunov<sup>2,#</sup>, Ina Rothenaigner<sup>1</sup>, Stefanie Strasser<sup>1</sup>,  
5 Tingying Peng<sup>2,§</sup>, and Kamyar Hadian<sup>1,§</sup>

6

7

8 <sup>1</sup> Research Unit Signaling and Translation, Molecular Targets and Therapeutics Center,  
9 Helmholtz Zentrum München, Neuherberg, Germany

10

11 <sup>2</sup> Helmholtz AI, Helmholtz Zentrum München, Neuherberg, Germany

12

13 # co-first authors

14 § co-corresponding authors

15

16

17

17

## 18 **Abstract**

19 Cell death, such as apoptosis and ferroptosis, play essential roles in the process of  
20 development, homeostasis, and pathogenesis of acute and chronic diseases. The  
21 increasing number of studies investigating cell death types in various diseases,  
22 particularly cancer and degenerative diseases, has raised hopes for their modulation  
23 in disease therapies. However, identifying the presence of a particular cell death type  
24 is not an obvious task, as it requires computationally intensive work and costly  
25 experimental assays. To address this challenge, we present CellDeathPred, a novel  
26 deep learning framework that uses high-content-imaging based on cell painting to  
27 distinguish cells undergoing ferroptosis or apoptosis from healthy cells. In particular,  
28 we incorporate a deep neural network that effectively embeds microscopic images into  
29 a representative and discriminative latent space, classifies the learned embedding into  
30 cell death modalities and optimizes the whole learning using the supervised  
31 contrastive loss function. We assessed the efficacy of the proposed framework using  
32 cell painting microscopy datasets from human HT-1080 cells, where multiple inducers  
33 of ferroptosis and apoptosis were used to trigger cell death. Our model confidently  
34 separates ferroptotic and apoptotic cells from healthy controls, with an averaged  
35 accuracy of 95% on non-confocal datasets, supporting the capacity of the  
36 CellDeathPred framework for cell death discovery.

37

38

39

## 40 **Introduction**

41 Cell death can be mediated by multiple signaling pathways and each type of cell death  
42 is associated with specific changes in cell and organelle shape and cytoskeletal  
43 organization, resulting in specific morphological features. Apoptosis is the most  
44 extensively studied form of regulated cell death, but in the past two decades, other  
45 forms have been discovered, including necroptosis, pyroptosis, and ferroptosis (1, 2,  
46 3). Cells that undergo apoptosis show these typical morphological changes: cell  
47 shrinkage followed by condensation/blistering, fragmentation and formation of  
48 apoptotic bodies (4). In contrast, other forms of cell death (necroptosis, pyroptosis, or  
49 ferroptosis) are not modulated by the activity of caspase-3/7 and hence represent  
50 distinct morphological features (5). Ferroptosis is an iron-dependent form of cell death  
51 that occurs as a consequence of lipid peroxidation (6, 7). It has been shown to be  
52 involved in multiple physiological and pathological processes, such as  
53 neurodegenerative disease, tissue damage, and acute renal failure (7). Ferroptotic  
54 cells typically show smaller mitochondria with reduced cristae and a ruptured outer  
55 membrane, but lack characteristic features of apoptosis such as chromatin  
56 condensation or apoptotic bodies (8, 9). In order to determine the acute, subacute,  
57 and chronic effects of drugs and chemical toxins, it is important to understand how a  
58 compound can induce cytotoxicity in cells and which of the various cell death pathways  
59 is activated. Cytotoxicity profiling of small molecule libraries is a well-established  
60 process in high-throughput-screening (HTS) campaigns (10), but most of the assay  
61 types detect only general cytotoxicity and do not examine the mode of action of the  
62 respective compounds. Usually, a combination of different approaches is used to study  
63 and distinguish apoptotic and the different non-apoptotic cell death processes in more  
64 detail.

65 It is known that cell morphology and cellular structures in response to small molecule  
66 treatment or genetic perturbations are very closely linked, such that morphological  
67 phenotypic screening might classify the mode of action of chemicals or genes in a cell  
68 (11). Based on this, the “cell painting” assay was developed. Cell painting is an image-  
69 based fluorescence microscopy assay that can be used to visualize the morphology  
70 of the cells by fluorescent labeling of cellular structures and subsequent analysis of  
71 cells (12). Through the multiplex use of fluorescent dyes, eight different cell structures  
72 can be examined simultaneously (12). After image acquisition with an automated  
73 microscope, the traditional workflow includes specialized high-content-analysis (HCA)  
74 software that can detect and further segment cellular objects and extract  
75 morphological features such as size, intensity or textures of the cell segments for  
76 further analysis including machine learning (ML) methods (12, 13). However, this  
77 requires appropriate software and can be subject to a certain bias, since only extracted  
78 features from the given images are further analyzed. Here, it is also possible that  
79 important information that would facilitate cell state classifications have not been fully  
80 detected. These features are also missing in the subsequent ML model.

81 Several recent publications leveraged deep learning (DL) for analyzing microscopic  
82 images and contributed a lot to canonical tasks in high-content screening (HCS) image  
83 analysis: *e.g.*, image synthesis and feature representation (13). One example shows  
84 an image-to-image translation architecture for synthesizing three different  
85 fluorescence images from bright-field microscopy images to observe the apoptosis,  
86 nuclei, and cytoplasm of cells (14). Another study proposed a U-Net architecture to  
87 synthesize AT8-pTau image given two DAPI and YFP-tau image channels (15). With  
88 the potential of DL architectures in extracting meaningful features directly from  
89 microscopic images, recent studies proposed self-supervised learning frameworks,

90 including a framework for studying the temporal drug effect on cancer cell images, or  
91 a framework to learn phenotypic embeddings of HCS images using self-supervised  
92 triplet network (16, 17). While these advancements in DL application to HCS images  
93 offer the potential to accelerate drug discovery, so far there is only very little work  
94 about the analysis and prediction of regulated cell death. Understanding and  
95 identifying drugs that lead to distinct cell death modalities is of high importance. Two  
96 studies describe ML and DL methods for predicting cell death modalities using  
97 microscopic images. The first work leveraged multinomial logistic regression models  
98 using the LASSO for discriminating microscopic images of fluorescently stained cells  
99 undergoing different cell death modalities—ferroptosis and apoptosis (18). Although  
100 promising, the current model is based on specific immunostaining, TfR1 (19) and  
101 Hoechst, which is limiting its generalizability to other cell death modalities. The second  
102 work utilizes a VGG-19 deep network to discriminate apoptosis from necroptosis (20).  
103 This method proposed a pre-filtering step to filter all cells that showed alive  
104 morphology from cell images where inducers were added, which enforces the DL  
105 model to classify cell death modalities from well selected image features.

106 In this study, we demonstrate a framework that learns from cell painting images without  
107 any pre-filtering step. This not only reduces the extra computation of a filtering step,  
108 but importantly, it enables the model to learn from heterogeneous cell images; thus,  
109 being a more generalizable model for different kinds of cell death-related images. The  
110 present work deals with the question: "Given microscopic images generated from a  
111 high-content cell painting assay, can we classify whether the drug induces ferroptosis,  
112 apoptosis or has no adverse effect?" Addressing such a question may be important in  
113 predicting the presence of a particular cell death type in clinically relevant drugs, which  
114 may open up new therapeutic possibilities.

115

## 116 **Results**

### 117 **Characterization of ferroptosis versus apoptosis inducers**

118 For this study, seven well-characterized apoptosis and ferroptosis inducers (FINs)  
119 were used to explore the applicability of a DL framework to classify ferroptotic,  
120 apoptotic and healthy cells (**Fig. 1A**). In order to confirm that ferroptosis is indeed  
121 induced by FINs, HT-1080 fibrosarcoma cells were seeded and either untreated or  
122 pre-treated with the ferroptosis inhibitor ferrostatin-1 (Fer-1) before RSL3 was added  
123 as a representative FIN at various concentrations (20-point titration). Fer-1 is  
124 described as an inhibitor of lipid peroxidation and rescues cells from ferroptosis (3).  
125 HT-1080 cells were chosen because they are well established in ferroptosis research  
126 (3, 21, 22) and well-suited for microscopy. By using the CellTiter-Glo (CTG) viability  
127 assay, which measures intracellular ATP levels, it could be shown that co-treatment  
128 of FINs with Fer-1 rescued cells from undergoing cell death (**Supplementary Fig. 1**).  
129 In contrast, staurosporine (STS) induced cell death could not be rescued with Fer-1  
130 co-treatment (**Supplementary Fig. 1**), demonstrating that the selected molecules are  
131 specific.

132

### 133 **Experimental setup and imaging upon cell painting**

134 For subsequent experiments, it was important to choose compound concentrations  
135 that have a mild to moderate effect on cell viability. Our goal was to treat cells in such  
136 a way that cell death was induced (ATP reduction), but the cells are not yet affected  
137 by excessive end phase necrosis. For this, we performed a pilot study with a wide  
138 range of concentrations (20-point titration) to determine optimal concentrations for  
139 each of the 14 small molecules. (**Fig. 1B**). We measured intracellular ATP levels after

140 24 and 72 hours, respectively, and then selected a concentration spectrum of 5  
141 concentrations based on the  $IC_{50}$  value for the subsequent experiments (**Table 1**).  
142 Different treatment durations of 24 and 72 hours were chosen, because some  
143 substances are known to induce cell death very quickly, while other compounds only  
144 have an increased toxic effect after several rounds of the cell cycle.  
145 Guided by the results of the pilot study, cell painting experiments were conducted  
146 using the optimized compound concentrations. HT-1080 cells were seeded in 384-well  
147 plates and treated with the five defined concentrations of the cell death inducers (**Table**  
148 **1**) for 24 and 72 hours. We used five (Hoechst 33342, Wheat Germ Agglutinin,  
149 Concanavalin A, TRITC-Phalloidin, Mitotracker) instead of the six dyes, which are  
150 described in the standard cell painting protocol, allowing us to run the assay on only  
151 one plate per data point instead of two parallel plates. Image sets of two slightly  
152 modified independent experiments were collected as training data sets: in experiment  
153 1 the cells were imaged with 40x magnification and a confocal spinning disk, while for  
154 experiment 2 a 40x magnification and widefield was used. Nine technical replicate  
155 wells for each substance and concentration within one experiment were imaged. In  
156 addition, we recorded nine to eleven images per well using four different fluorescence  
157 channels, creating a large image data set per experiment. In order to check the  
158 strength of cell death for each treatment condition (compound and concentration), we  
159 performed CTG assays in parallel (**Fig. 2A**). Importantly, the cell pool, the number of  
160 cells, the compound plates, and the way of treatment that were used for CTG  
161 measurement were identical to those used in the cell painting experiment. In a next  
162 step, the data of the ATP measurement and cell painting were annotated. By this we  
163 were able to select only images for training that reflected a certain level of intracellular  
164 ATP reduction. In all the experiments, we normalized the absolute ATP values to the

165 DMSO levels. So, the wells with values close to 1.0 are considered not to be affected.  
166 While those approaching 0.0 are "dead". We selected wells with ATP values that fall  
167 into the range [0.3 - 0.8]. Supposedly, in these wells the treatments did not completely  
168 kill the cell population and at the same time caused some non-negligible effect  
169 including morphological changes. We also analyzed the images with the Columbus  
170 high-content-analysis software. For this purpose, the nuclei were identified using  
171 Hoechst signal, and based on this, the cytoplasm and the membrane regions were  
172 segmented using the F-actin signal (**Supplementary Fig. 2**). The intensity, the  
173 morphology, and the symmetry of the objects, as well as the texture properties, and  
174 structure of the fluorescence signal were determined within these defined cell  
175 segments for the different fluorescent channels. This resulted in 245 extracted features  
176 that could be used for classical machine learning (ML) approaches. Importantly, the  
177 features for single cells were averaged for images coming from the same well  
178 (median).

179

### 180 **CellDeathPred architecture and classification strategy**

181 To predict whether treatment of cells with a certain drug induces apoptosis or  
182 ferroptosis or has no effect, we developed CellDeathPred, a DL architecture  
183 comprising four parts: data augmentation, model backbone, an embedder network  
184 trained with supervised contrastive loss and finally a classification network trained with  
185 cross-entropy loss (**Fig. 3A**). Data augmentation is a widely used technique in DL,  
186 which aims to improve the generalizability of the model during training; thus,  
187 enhancing the prediction accuracy of the classifier. We applied five crops to the initial  
188 1320x1024 image. Then, we applied to each 512x512 crop the horizontal and vertical  
189 flips, 90 rotation and the gaussian noise augmentations (**Fig. 3B**). We chose our model



190 backbone to be EfficientNet-b0 (23), a convolutional neural network that is pretrained  
191 on the large scale of the ImageNet dataset comprising 1,000 classes of RGB images.  
192 Since our images have four channels (*i.e.*, ER, Actin/Golgi, Mitochondria, and Nuclei),  
193 we replaced the first layer of the backbone network, which originally accepts three-  
194 channel images with a four-channel input. We assigned the average weight of the  
195 three channels to be the weight for the fourth channel. The pretrained EfficientNet-b0  
196 has a role of feature extractor for our cellular dataset; therefore to classify the drugs  
197 we added a classification layer trained with the cross-entropy loss. While this is a  
198 universal loss term used in most of DL classification frameworks, recent studies  
199 showed that the cross-entropy loss alone cannot guarantee a good generalizability of  
200 the trained network, in particular in the presence of a batch effect (24). Batch effect is  
201 a common problem in microscopy imaging data, which refers to systematic differences  
202 such as temperature or microscopy lighting conditions in an experiment cause change  
203 in the image intensities and features from batch to batch—*i.e.*, one batch refers to a set  
204 of experimental plates that are executed together. To solve this issue, we added a  
205 supervised contrastive loss (SupConLoss) after an embedder network that consists of  
206 a sequence of fully connected layers that maps the output of the backbone into a low  
207 dimensional space (Fig 3A). SupConLoss is a recent state-of-the-art metric learning  
208 loss term that aims to maximize the similarity between a pair of samples in the same  
209 class whilst minimizing the similarity of two samples from different classes (25). By  
210 encouraging the network to learn a more robust and discriminative representation,  
211 SupConLoss improves its generalizability (for more details we refer the reader to the  
212 material and methods section). Moreover, to better overcome the batch effect issue,  
213 we further propose a batch-aware sampling strategy in conjunction with SupConLoss  
214 (for more details we refer the reader to the material and methods section). A byproduct

215 of SupConLoss is image retrieval at the testing stage (**Fig. 3C**): given an input testing  
216 image our CellDeathPred framework generates the embedding features and retrieves  
217 K-nearest-neighbor (KNN) in the training images by ranking feature distance in the  
218 embedding space (we choose  $k = 1$  and a cosine distance as a metric, details refer  
219 to the material and methods section). Besides image retrieval, CellDeathPred also  
220 predicts the probability of an input image to belong to each of the main classes (i.e.,  
221 healthy, apoptosis or ferroptosis) (**Fig. 3D**).

222

### 223 **DL versus ML classification to classify cell death from cell painting**

224 In order to test the CellDeathPred model on a previously unseen data set, we  
225 performed a third experiment in the same way as described in Figure 3  
226 (**Supplementary Fig. 4**). In contrast to experiment 1 and 2, the cells were only treated  
227 for 24 hours, but this time we imaged the plates of the same experiment both confocal  
228 and non-confocal to investigate whether this has an impact on the classification  
229 accuracy. Also, these images were analyzed with our imaging software and 245  
230 features were extracted. Before evaluating ML models on the features extracted by  
231 Columbus software, a preprocessing step was essential for training the models.  
232 Mainly, we removed columns with not a number (NaN) values, duplicated columns and  
233 normalized the values. We chose three ML models widely used in the literature:  
234 Random Forest (26), Logistic Regression (27) and AdaBoost (28). We used uniform  
235 manifold approximation and projection (UMAP) (29) as a dimension reduction  
236 technique to visualize how images of ferroptosis drugs cluster from those of apoptosis,  
237 and the healthy cells. As shown in the UMAP of CellDeathPred learnt feature space  
238 (**Fig. 4A (DL)**), images of healthy, apoptosis and ferroptosis classes are clustered into  
239 three distinct clusters, whilst they are mixed in the UMAP of cellular features extracted

240 from Columbus software (**Fig. 4A (ML)**). A side-by-side comparison of DL vs ML  
241 methods (**Fig. 4B**) show that CellDeathPred reached a classification accuracy of over  
242 93% for Plate 1 and Plate 2, which is almost 10% increase over the best ML method.  
243 Also, in most cases, CellDeathPred with SupConLoss outperforms CellDeathPred w/o  
244 SupConLoss (**Fig. 4B**), suggesting better model generalizability. This could also be  
245 demonstrated by the UMAP of feature space when we color the images according to  
246 their batch whilst images of different plates are well mixed, suggesting SupConLoss is  
247 effective in avoiding the batch effect problem (**Supplementary Fig. 5**).

248

### 249 **Classification of ferroptotic and apoptotic cells at different drug concentration** 250 **using CellDeathPred**

251 In the previous paragraph, we demonstrated that CellDeathPred is more accurate than  
252 the tested ML models. Moreover, we have shown that non-confocal images are  
253 sufficient for the separation of the different classes in the UMAP and for accurate  
254 classification. Therefore, we focused on the DL results of the non-confocal images as  
255 their acquisition requires a fraction of the imaging time compared to confocal images  
256 with comparable prediction accuracy (**Fig. 4B**). Like all other experiments, experiment  
257 3 was performed as technical triplicate (three different 384 well plates, 24h treatment).  
258 In addition, every substance, whether ferroptosis or apoptosis inducer, occurred in  
259 triplicates in five different concentrations on each of the three plates. First, we checked  
260 the ATP level from the experiment that was conducted in parallel to the cell painting  
261 assay. Most of the 14 substances led to increased cell death with increasing  
262 concentrations (**Supplementary Fig. 3**), indicating that we have chosen the correct  
263 concentration range. The confusion matrix of the CellDeathPred DL model showed  
264 that the prediction worked very well, and to a large extent both types of cell death

265 inducers and healthy cells were correctly classified (close to 100% for plates 01 and  
266 02). However, it also showed that the predictions for plate 03 were worse than for plate  
267 01 and 02 (**Fig. 5A**). To identify the cause of the lower prediction accuracy of plate 03,  
268 we used the data from the image segmentation and the feature nucleus area as an  
269 indicator of the potency of the small molecules in the cell painting experiment (**Fig.**  
270 **5B**). Here, plate 03 appeared to be very different from plate 01 and 02, where cell  
271 death induction is much weaker. In fact, by chance plate 03 acted as a good control  
272 and confirmed the high accuracy of CellDeathPred that classifies cell death only if  
273 sufficient loss of viability is present, which was not the case in plate 03. Next, we  
274 analyzed the prediction accuracy of the individual substances depending on the ATP  
275 signal. Usually, a correct prediction was achieved with a cell viability of around 50%  
276 (**Fig. 5C**). If the concentrations of the substances are too low and thus the viability  
277 higher than 80%, the cells are classified as healthy. For example, the ATP levels in  
278 cells treated with Actinomycin D and Erastin are relatively high in this experiment,  
279 indicating that they did not induce cell death (**Fig. 5C**). Accordingly, CellDeathPred  
280 classified the cells treated with Erastin or Actinomycin D mainly as "healthy" in this  
281 case, again demonstrating its high accuracy based on the experimental performance.  
282 Together, we have developed CellDeathPred, a DL framework, which is able to  
283 classify ferroptotic and apoptotic cells with an accuracy of close to 100% using non-  
284 confocal images, when the drugs sufficiently induce the type of cell death.

285

## 286 **Discussion**

287 To induce cell death, we chose seven apoptosis inducers and seven FINs to ensure  
288 that the generated data are balanced for each of the respective cell death modality.  
289 Notably, we selected the cell death inducers to modulate different biological targets of

290 the given cell death modality in order to cover larger aspects of apoptosis and  
291 ferroptosis. Here, the seven apoptosis inducers targeted caspases, microtubules,  
292 oxidative phosphorylation, RNA-synthesis, and topoisomerase II. The seven  
293 ferroptosis inhibitors belonged to class I, II, III and IV FINs; thus, inhibiting system  $x_c^-$   
294 , and GPX4 activity in a direct or indirect manner. Of course, the collection of 14 small  
295 molecules does not cover all possibilities to induce apoptotic or ferroptotic cell death,  
296 and it may be interesting to test other substances in future to understand if  
297 CellDeathPred would correctly classify them into the correct categories.

298 We created the CellDeathPred model by using datasets in a single cell line and one  
299 type of microscope with specific settings, and we are aware that this choice limits the  
300 potential for generalizability of our model using it for datasets created with other cell  
301 lines and microscopic devices. However, the 14 selected substances can serve as  
302 internal benchmarks to generate comparable datasets with other cell lines and other  
303 small molecules that can be used to train the model.

304 Determining the exact concentration series of the different substances was crucial to  
305 generate highly standardized data in order to minimize technical variability and  
306 therefore maximize the biological signal in the data. Our assumption was that if the  
307 concentrations are too low the cells are relatively healthy. In contrast, if the  
308 concentrations are too high the cells might be already in a necrotic phase and any kind  
309 of ML or DL model would have problems to correctly classify these cells. In fact, we  
310 recommend identifying the  $IC_{50}$  for all substances used in new experiments in order to  
311 have internal controls for the assay. With the defined induction rate, we made use of  
312 the cell painting assay (12) to visualize healthy, apoptotic or ferroptotic cells. Previous  
313 efforts to stain cell death have been selective of a given cell death modality, *e.g.*, *TfR1*  
314 staining for ferroptosis (18, 19) or Annexin-V staining for apoptosis (30). Importantly,

315 by applying cell painting to visualize cell death the procedure does not rely on specific  
316 markers, but can use general content-information about DNA, ER, mitochondria,  
317 Golgi, and actin to profile cells with regards to distinguishing healthy state from  
318 apoptosis and ferroptosis. This advance will enable the rapid transfer of CellDeathPred  
319 to other forms of cell death, such as necroptosis and pyroptosis. The performance of  
320 CellDeathPred to classify apoptosis and ferroptosis was close to 100%, and  
321 importantly in cases where experimental failure led to poor cell death induction (*e.g.*,  
322 Erastin hardly induced any ferroptosis in plate 03 of the test experiment) the model  
323 correctly classified such samples as healthy cells (**Fig. 5C**).

324 In CellDeathPred, we applied contrastive learning to allow the model to pull together  
325 cell death modality images of a particular treatment. This is represented in the total  
326 loss that combines the contrastive learning and cross-entropy losses with equal  
327 weights. Moreover, to combat the batch effect during training, we added more diversity  
328 by including images from different plates to a batch and thereby reducing batch effect.  
329 Our choice for the backbone model was also important to achieve high prediction  
330 performance. In the literature, EfficientNet models demonstrated a better efficiency  
331 over existing state-of-the-art architecture such as ResNet-18 (31). Therefore, adopting  
332 a transfer learning strategy and further training the backbone on our cellular dataset  
333 had the advantage regarding computational efficiency and accuracy compared to  
334 training from scratch and extracting representative features. As our model is the first  
335 deep learning model aiming to distinguish ferroptosis-based modulators from  
336 apoptosis and healthy ones, we compared it with a baseline method “CellDeathPred  
337 w/o SL”, where we removed the SupConLoss and we kept the same architecture, and  
338 three different machine learning models Random Forest, Logistic Regression, and  
339 AdaBoost. To validate our model, we investigated the accuracy and F1-score metrics

340 for the four comparison methods (**Fig. 4**). Our model (“CellDeathPred with SL”) mostly  
341 outperformed its variant (w/o SL), and was better than all ML models in confocal and  
342 non-confocal assays.

343 It would be interesting for the future investigations to investigate substances that have  
344 not yet been assigned to any of the cell deaths, but which have shown cytotoxic  
345 effects, and understand if they induce a specific form of cell death. Moreover,  
346 CellDeathPred should be expanded in future studies to integrate other regulated cell  
347 deaths, such as necroptosis and pyroptosis.

348

## 349 **Conclusions**

350 In summary, we have demonstrated that our CellDeathPred framework is able to  
351 accurately classify cells that were treated with small molecules inducing ferroptotic and  
352 apoptotic cell death. Here we present a detailed experimental protocol on how to  
353 generate the data, to train and use our developed CellDeathPred model. This work will  
354 contribute to the characterization of cell death inducing small molecules or biologics,  
355 and thereby help to better understand their mode of action. We think that our work  
356 based on the cell painting protocol in combination with our DL model can be extended  
357 to other questions in the classification of chemical substances and thus may act as a  
358 blueprint for comparable future projects.

359

## 360 **Materials and methods**

### 361 Cultivation of cells

362 HT-1080 cells were cultivated in DMEM with high glucose, glutamine, and pyruvate  
363 (Gibco™), supplemented with 10% FBS (Gibco™), 1% Penicillin-Streptomycin



364 (Gibco™), 1% NEAA (Gibco™). They were grown in the incubator at 37 °C and 5%  
365 CO<sub>2</sub>.

366

367 CellTiterGlo® assay

368 HT-1080 cells were seeded 1000 cells/well in 50 µl DMEM with high glucose,

369 glutamine and pyruvate (Gibco™), supplemented with 10% FBS (Gibco™), 1%

370 Penicillin-Streptomycin (Gibco™), 1% NEAA (Gibco™) on white opaque 384-well

371 CulturPlate-384 Microplates (PerkinElmer, 6007680). Seeding was performed with the

372 MultiFlo Microplate Dispenser (BioTek). The next day compounds were diluted in

373 DMSO on a compound plate. 0,5 µl were transferred from the compound plate onto

374 the cells with the Sciclone G3 Liquid Handling Workstation (PerkinElmer). Before

375 addition of compounds, cells were pre-treated with 5 µl media (control) or 5µl Fer-1

376 media solution to have a final concentration of 2 µM on the cells. When the CellTiter

377 Glo assay was performed in parallel with the cell painting assay, deviations from the

378 standard assay protocol occurred. 1000 cells were seeded in 25 µl media instead of

379 50µl. In addition, as for the cell painting experiment, an intermediate dilution step was

380 introduced during compound transfer. For this, compounds were transferred into

381 plates containing only cell medium. In a next step 25 µl of the compound cell culture

382 media mix were carefully transferred from the intermediate plate on plates with the

383 cells in 25 µl media using a Beckman Coulter Biomek Fx. After 24 h or 72 h incubation

384 at 37 °C and 5% CO<sub>2</sub> in the incubator (Cytomat, ThermoFisher), 25 µl CellTiterGlo®

385 (Promega) per well was added and the luminescence was read at 700 nm,

386 measurement height 6.5 mm and measurement time 0.5 s with EnVision Multimode

387 Plate Reader (PerkinElmer).

388



389 Cell painting Reagents

390 Mitotracker Deep Red (Invitrogen, #M22426), WGA (Invitrogen, #W32464),  
391 Concanavalin (Invitrogen, #C11252) and Hoechst 33342 (Invitrogen, #H3570) stock  
392 solutions were prepared according to supplier information. For Phalloidin-TRITC  
393 (Sigma, #P1951) methanol was added to 1 vial to prepare 0,1 mg/ml stock solution.

394 Cell painting assay

395 HT-1080 cells were seeded with a cell number of 1000 cells/well in 25µl cell culture  
396 media on PhenoPlate™ 384-well microplates (PerkinElmer, 6057308) with the MultiFlo  
397 Microplate Dispenser (BioTek) to have 6 replicates. Compounds were diluted in a 20-  
398 or 5-point titration with DMSO (x mM) as highest concentrations on a compound plate.  
399 On the next day transfer and mix of compounds into plates only containing cell culture  
400 media was performed with the Sciclone G3 Liquid Handling Workstation  
401 (PerkinElmer). This intermediate dilution step was included to avoid DMSO gradient  
402 effects on cell monolayers. In a next step 25µl of the compound cell culture media mix  
403 were carefully transferred from the intermediate plate on plates with the cells using a  
404 Beckman Coulter Biomek Fx followed by incubation in the Cytomat incubator  
405 (ThermoFisher) at 37°C and 5% CO<sub>2</sub> for 24 and or 72 h. The cell painting protocol was  
406 performed as described in Anne Carpenter's original publication (12). The only  
407 deviations were the omission of the Syto14 dye and the use of phalloidin-TRITC  
408 instead of phalloidin-568. The settings we have chosen for the Operetta microscope  
409 are as follows: Acquisition type: Spinning disk confocal or widefield with 40x high na  
410 objective. Main emission [nm]/ main excitation [nm]: 525/ 475 for ER stain, 445/ 380  
411 for nucleus stain, 705/ 630 for mitochondria stain, 595/ 535 for actin-RNA stain.

412

413 Automated image analysis

414 Image analysis was performed using Columbus software version 2.9.1 (PerkinElmer).  
415 In the following, the analysis steps in Columbus are described: the Hoechst 33342 and  
416 TRITC signals were smoothed for the cell segmentation process using Median  
417 filters to reduce noise signals. Nuclei were detected via the Hoechst 33342 signal. The  
418 TRITC channel was used to define the cytoplasm. In a next step,  
419 morphology/symmetry features, texture (SER features), and intensity properties of the  
420 Hoechst 33342, TRITC, 488 and 647 channels were calculated for each cell region  
421 (nuclei and cytoplasm). Moreover, we applied a filter to remove border objects (nuclei  
422 that cross image borders). For the detailed analysis pipeline in Columbus, please see  
423 **Supplementary Table 1** with the analysis sequences.

424

425 Model training and application

426 Designing a DL model for distinguishing between cell death modalities given a set of  
427 microscopic images is challenging due to several factors as explained previously:  
428 batch effect and reduced generalizability performance. To overcome these issues, we  
429 propose to train in a supervised contrastive learning fashion using the SupConLoss  
430 defined as follows:

$$\mathcal{L}^{sup} = \sum_{i \in I} \mathcal{L}_i^{sup} = \sum_{i \in I} \frac{-1}{|P(i)|} \sum_{p \in P(i)} \log \frac{\exp(\mathbf{z}_i \cdot \mathbf{z}_p / \tau)}{\sum_{a \in A(i)} \exp(\mathbf{z}_i \cdot \mathbf{z}_a / \tau)}$$

431

432  $\mathbf{z}_i$  is an embedding vector with class label  $y_i$  generated by the embedder  
433 network.  $i$  is an anchor in the batch  $I$ .  $P(i) = \{p \in A(i) : y_i = y_p\}$  denotes positive  
434 samples that belong to the same class. SupConLoss first calculates the inner product  
435 of the anchor with samples in  $P(i)$ , second applies an exponential function in order

436 to amplify large values. The outputs are summed up and normalized over all samples

437  $\tau$  denotes the supervised temperature, a hyperparameter that helps

438 disentangling positive and negative samples. The main benefit of our supervised

439 contrastive learning is that it disentangles batch effects from relevant biological

440 variables (24, 32) and this can be seen in the UMAP reported results (**Fig.4 A**). Mainly,

441 we chose UMAP over other dimensionality reduction techniques such as t-distributed

442 stochastic neighbor embedding (t-SNE) or principal component analysis (PCA) owing

443 to its speed and performance for the preservation of the global structure of the data.

444 To further tackle the batch effect problem, we propose a batch-aware sampling

445 strategy to better train our network. We further use categorical cross entropy as

446 classification loss during training. Ultimately, in our CellDeathPred architecture, we

447 define the overall loss function as:  $\mathcal{L} = \lambda_1 \cdot \mathcal{L}^{sup} + \lambda_2 \cdot \mathcal{L}^{ce}$

448 where  $\lambda_1$  and  $\lambda_2$  are hyper-parameters that control the relative

449 importance of SupConLoss and cross entropy losses, respectively. Empirically, we set

450 the temperature parameter of the SupConLoss, the learning rate and both

451  $\lambda_1$  and  $\lambda_2$  to 0.1,  $1.25e-5$  and 0.5, respectively. We define the

452 batch size  $bs$  using the following formula:

453 
$$bs = n_{plates} \cdot n_{samples} \cdot y$$
 For a batch of size 30, we compute it as

454  $30 = 2 * 5 * 3$ , which means it consists of samples from two plates with 5 samples of

455 each cell death modality. The batch-norm layers were freezed to reduce overfitting. In

456 the contrastive learning context we define a sample triplets: anchor, positive and

457 negative. We define the anchor as an image belonging to a plate  $p_i$  and the class

458  $y_i$ , while we choose the positive sample to be an image from another plate  $p_p$

459 ( $p_i \neq p_p$ ) having the same label as the anchor and we define a negative sample  
460 as an image belonging to the same plate of the anchor with a different label  $y_n$   
461 ( $y_i \neq y_n$ ). The ultimate goal is to minimize the distance between the anchor and  
462 positive samples and maximize the one between the anchor and negative samples.  
463 The main advantage of the sampling strategy is increasing heterogeneity of the batch  
464 during training thus increasing the generalizability of the model in the case of having  
465 a dataset with batch effect. To evaluate our model, we first train it using 80% of the  
466 dataset and test it on 20%. We report accuracy and F1-score results in the field level  
467 (**Fig. 4B**) and in the well level (**Fig. 5A**). Knowing that all fields belonging to a particular  
468 well have the same label, we define the prediction on the well level as the majority  
469 voting where we count the number of apoptosis, ferroptosis, healthy predictions of the  
470 fields and assign the class with the maximum votes as the well class.  
471 Equipped with the above components, the proposed CellDeathPred not only  
472 overcomes the issues of applying a DL model on cell painting data but also represents  
473 the first automatic labeling method of drugs that can be easily adopted for classification  
474 on other datasets.

475

## 476 **Acknowledgements**

477 We thank Christian Pütz and Stefanie Brandner for excellent technical assistance.

478

## 479 **Conflict of Interest Statement**

480 The authors declare no competing interests.

481

## 482 **Author Contribution Statement**

483 K.S. and K.H. conceptualized the study; K.S., I.R., S.S., and K.H. performed and  
484 analyzed the wet-lab experiments (viability assays, cell painting, imaging, feature  
485 extraction for machine learning); A.B., A.B., and T.P. generated the CellDeathPred  
486 deep learning framework, analyzed the cell painting data (deep learning and machine  
487 learning), and classified cell death modalities. K.S., A.B. (Alaa), T.P., K.H. wrote the  
488 original draft; All authors read and edited the manuscript, commented and approved  
489 the manuscript for submission.

490

### 491 **Ethics Statement**

492 No ethical concerns.

493

### 494 **Funding Statement**

495 A.B. (Alaa), A.B. (Aidin), and T.P. were funded by Helmholtz Association's Initiative  
496 and Networking Fund through Helmholtz AI. K.S., I.R., S.S., and K.H. were supported  
497 by funds from Helmholtz Munich.

498

### 499 **Data Availability Statement**

500 The image data used in this work are available at [https://github.com/peng-](https://github.com/peng-lab/CellDeathPred/tree/main/Dataset)  
501 [lab/CellDeathPred/tree/main/Dataset](https://github.com/peng-lab/CellDeathPred/tree/main/Dataset) and the source code for the models used in this  
502 work is available at <https://github.com/peng-lab/CellDeathPred/tree/main/Code>.

503

504

505

506

507

## 508 References

- 509 1. Cookson BT, Brennan MA. Pro-inflammatory programmed cell death. *Trends*  
510 *Microbiol.* 2001;9(3):113-4.
- 511 2. Degtarev A, Huang Z, Boyce M, Li Y, Jagtap P, Mizushima N, et al. Chemical  
512 inhibitor of nonapoptotic cell death with therapeutic potential for ischemic brain injury. *Nat*  
513 *Chem Biol.* 2005;1(2):112-9.
- 514 3. Dixon SJ, Lemberg KM, Lamprecht MR, Skouta R, Zaitsev EM, Gleason CE, et al.  
515 Ferroptosis: an iron-dependent form of nonapoptotic cell death. *Cell.* 2012;149(5):1060-72.
- 516 4. Kerr JF, Wyllie AH, Currie AR. Apoptosis: a basic biological phenomenon with wide-  
517 ranging implications in tissue kinetics. *Br J Cancer.* 1972;26(4):239-57.
- 518 5. Galluzzi L, Vitale I, Aaronson SA, Abrams JM, Adam D, Agostinis P, et al. Molecular  
519 mechanisms of cell death: recommendations of the Nomenclature Committee on Cell Death  
520 2018. *Cell Death Differ.* 2018;25(3):486-541.
- 521 6. Hadian K, Stockwell BR. SnapShot: Ferroptosis. *Cell.* 2020;181(5):1188- e1.
- 522 7. Stockwell BR. Ferroptosis turns 10: Emerging mechanisms, physiological functions,  
523 and therapeutic applications. *Cell.* 2022;185(14):2401-21.
- 524 8. Tang D, Kang R, Berghe TV, Vandenabeele P, Kroemer G. The molecular machinery  
525 of regulated cell death. *Cell Res.* 2019;29(5):347-64.
- 526 9. Xie Y, Hou W, Song X, Yu Y, Huang J, Sun X, et al. Ferroptosis: process and  
527 function. *Cell Death Differ.* 2016;23(3):369-79.
- 528 10. Mervin LH, Cao Q, Barrett IP, Firth MA, Murray D, McWilliams L, et al. Understanding  
529 Cytotoxicity and Cytostaticity in a High-Throughput Screening Collection. *ACS Chem Biol.*  
530 2016;11(11):3007-23.
- 531 11. Adams CL, Kutsy V, Coleman DA, Cong G, Crompton AM, Elias KA, et al.  
532 Compound classification using image-based cellular phenotypes. *Methods Enzymol.*  
533 2006;414:440-68.
- 534 12. Bray MA, Singh S, Han H, Davis CT, Borgeson B, Hartland C, et al. Cell Painting, a  
535 high-content image-based assay for morphological profiling using multiplexed fluorescent  
536 dyes. *Nat Protoc.* 2016;11(9):1757-74.
- 537 13. Lin S, Schorpp K, Rothenaigner I, Hadian K. Image-based high-content screening in  
538 drug discovery. *Drug Discov Today.* 2020;25(8):1348-61.
- 539 14. Lee G, Oh JW, Her NG, Jeong WK. DeepHCS(++): Bright-field to fluorescence  
540 microscopy image conversion using multi-task learning with adversarial losses for label-free  
541 high-content screening. *Med Image Anal.* 2021;70:101995.
- 542 15. Wong DR, Conrad J, Johnson N, Ayers J, Laeremans A, Lee JC, et al. Trans-  
543 channel fluorescence learning improves high-content screening for Alzheimer's disease  
544 therapeutics. *Nat Mach Intell.* 2022;4(6):583-95.
- 545 16. Dmitrenko A, Masiero MM, Zamboni N. Self-supervised learning for analysis of  
546 temporal and morphological drug effects in cancer cell imaging data 2022 [Available from:  
547 <https://doi.org/10.48550/arXiv.2203.04289>].
- 548 17. Siegismund D, Wieser M, Heyse S, Steigele S. Self-Supervised Representation  
549 Learning for High-Content Screening 2022 [Available from:  
550 <https://openreview.net/pdf?id=XIofcluPNU>].
- 551 18. Jin J, Schorpp K, Samaga D, Unger K, Hadian K, Stockwell BR. Machine Learning  
552 Classifies Ferroptosis and Apoptosis Cell Death Modalities with TfR1 Immunostaining. *ACS*  
553 *Chem Biol.* 2022;17(3):654-60.
- 554 19. Feng H, Schorpp K, Jin J, Yozwiak CE, Hoffstrom BG, Decker AM, et al. Transferrin  
555 Receptor Is a Specific Ferroptosis Marker. *Cell Rep.* 2020;30(10):3411-23 e7.
- 556 20. Verduijn J, Van der Meeren L, Krysko DV, Skirtach AG. Deep learning with digital  
557 holographic microscopy discriminates apoptosis and necroptosis. *Cell Death Discov.*  
558 2021;7(1):229.

- 559 21. Kraft VAN, Bezjian CT, Pfeiffer S, Ringelstetter L, Müller C, Zandkarimi F, et al. GTP  
560 Cyclohydrolase 1/Tetrahydrobiopterin Counteract Ferroptosis through Lipid Remodeling.  
561 ACS Cent Sci. 2020;6(1):41-53.
- 562 22. Doll S, Freitas FP, Shah R, Aldrovandi M, da Silva MC, Ingold I, et al. FSP1 is a  
563 glutathione-independent ferroptosis suppressor. Nature. 2019;575(7784):693-8.
- 564 23. Tan M, Quoc VL. EfficientNet: Rethinking Model Scaling for Convolutional Neural  
565 Networks. 2019 [Available from: <https://arxiv.org/abs/1905.11946>].
- 566 24. Tran M, Wagner SJ, Boxberg M, Peng T. S5CL: Unifying Fully-Supervised, Self-  
567 Supervised, and Semi-Supervised Learning Through Hierarchical Contrastive Learning 2022  
568 [Available from: <https://arxiv.org/abs/2203.07307>].
- 569 25. Khosla P, Teterwak P, Wang C, Sarna A, Tian Y, Isola P, et al. Supervised  
570 Contrastive Learning 2020 [Available from: <https://arxiv.org/abs/2004.11362>].
- 571 26. Ho TK. Random decision forests. 1995(Proceedings of 3rd International Conference  
572 on Document Analysis and Recognition): pp. 278-82 vol.1.
- 573 27. Jr. DWH, Lemeshow S, Sturdivant RX. Applied Logistic Regression, Third  
574 Edition 2013.
- 575 28. Freund Y, Schapire RE. A decision-theoretic generalization of on-line learning and an  
576 application to boosting. European Conference on Computational Learning Theory; Vitányi:  
577 Springer, Berlin, Heidelberg; 1995. p. pp 23–37.
- 578 29. McInnes L, Healy J, Melville J. UMAP: Uniform Manifold Approximation and  
579 Projection for Dimension Reduction 2018 [Available from: <https://arxiv.org/abs/1802.03426>].
- 580 30. van Engeland M, Nieland LJ, Ramaekers FC, Schutte B, Reutelingsperger CP.  
581 Annexin V-affinity assay: a review on an apoptosis detection system based on  
582 phosphatidylserine exposure. Cytometry. 1998;31(1):1-9.
- 583 31. He K, Zhang X, Ren S, Sun J. Deep Residual Learning for Image Recognition. 2016  
584 IEEE Conference on Computer Vision and Pattern Recognition (CVPR); Las Vegas, NV,  
585 USA: IEEE; 2016.
- 586 32. Simon LM, Wang, YY. & Zhao, Z. Integration of millions of transcriptomes using  
587 batch-aware triplet neural networks. Nat Mach Intell. 2021(3):705–15.
- 588

589 **Table 1:** Five concentrations for each substance. IC50, one concentration higher [+]  
590 and three different concentrations lower [-], [- -] and [- - -] than the IC50

591

592 **Figure 1: Identification of the ideal concentrations of apoptosis and ferroptosis**  
593 **inducers**

594 **(A)** Schematic overview of the cell death inducers used for this study. HT-1080 cells  
595 were seeded and treated with 7 apoptosis inducers, 7 ferroptosis inducers (FINs) and  
596 DMSO as a solvent control. Cells treated with apoptosis inducers execute the  
597 apoptotic program by activating caspases. Treatment of cells with FINs result in lipid  
598 peroxide accumulation due to the limited GPX4 activity and hence induce ferroptosis

599 **(B)** Results of the dose response (20-point) viability assay with apoptosis inducers in



600 HT-1080 cells. 24h and 72h incubation time. Cellular ATP levels were measured using  
601 luminescence signals. Values indicate mean  $\pm$  SD (n = 6, technical replicates). **(C)**  
602 Same as in (B) here for treatment with FINs.

603

604 **Figure 2: Schematic overview of the data generation process.**

605 **(A)** HT-1080 cells were treated with five different concentrations of apoptosis and  
606 ferroptosis inducers. ATP measurement (left) and cell painting (right) experiments  
607 were conducted in parallel. Staurosporine (STS) and RSL3 data are shown as  
608 representative data for apoptosis and ferroptosis inducers, respectively. Values  
609 indicate mean values  $\pm$  SD of 6 technical replicates. The cells were imaged with a 40x  
610 objective. The different organelles (nuclei, golgi apparatus, actin cytoskeleton,  
611 mitochondria, endoplasmatic reticulum) were imaged using four different fluorescence  
612 channels. **(B)** The data from the viability assay were annotated with the images from  
613 the cell painting experiment. Only if viability was in the range of 80-30% the images  
614 were used for model training. Three experiments were performed. Experiments 1 and  
615 2 were used for training the CellDeathPred model. Experiment 3 to test the model.

616

617 **Figure 3: CellDeathPred architecture for classifying cell death modalities.**

618 **(A)** Given four channels of the raw image (ER, Actin/Golgi, Mitochondria and Nuclei)  
619 as input, the neural network predicts whether the drug used in the experiment induces  
620 apoptosis or ferroptosis or it is a DMSO one. The architecture comprised four phases:  
621 (1) data augmentation to ensure robustness of the model during training, (2) backbone  
622 model which is a pretrained network (Efficientnet-b0), (3) an embedder is a sequence  
623 of fully connected layers to map the input data to a low-dimensional space, and (4) a  
624 classifier which is a sequence of fully connected layers that outputs the predicted



625 modality. **(B)** Illustration of the used augmentations. Four corner and one center crops  
626 with sizes 512x512. Augmentations were applied to each crop. **(C)** Example of an  
627 image retrieval. Ten nearest neighbors for a query image in the embedding space. **(D)**  
628 The last layer with three nodes of the model. Classification predictions of the three  
629 classes.

630

#### 631 **Figure 4: Comparing CellDeathPred with other ML models.**

632 **(A)** UMAP of embeddings of experiment 3 plates with confocal and non-confocal  
633 imaging. Every point corresponds to the embedding of an image. On the left using the  
634 CellDeathPred model which was trained on images from experiment 1 and 2.  
635 Individual wells are visualized as points on the scatter plot of the first two principal  
636 components. On the right UMAP of 245 features extracted from the images initially  
637 extracted from Columbus software. The color code is according to the drug category  
638 (blue = “healthy”, red = “apoptosis”, green = “ferroptosis”) and was added after the  
639 UMAP was conducted. **(B)** Accuracy and F1-score results on the well level are shown  
640 per plate for confocal data (top row) and non-confocal data (on the bottom row). The  
641 x-axis represents the proposed method CellDeathPred, its variant where we remove  
642 the SupConLoss and the machine learning-based methods widely used in the  
643 literature. The proposed deep learning model achieved best performance in both  
644 evaluation metrics compared to the comparison methods.

645

#### 646 **Figure 5: Results of the DL model**

647 **(A)** Confusion matrices for experiment 3 (non-confocal) with CellDeathPred model.  
648 The model was trained on images from experiment 1 and 2. Order of plates from left  
649 to right. Heatmap of the ATP measurement that was conducted in parallel to the cell

650 painting experiment. Low (black) and high (yellow) luminescence signals correspond  
651 to the cellular ATP levels. The experiment was performed in technical replicates (three  
652 plates). Cells were treated with five different concentrations for each small molecule.  
653 **(B)** Heatmap of the nuclei count that was conducted on the images of the cell painting  
654 experiment. Low (black) and high (yellow) luminescence signals correspond to the  
655 number of selected nuclei. The experiment was performed in technical replicates  
656 (three plates). Cells were treated with five different concentrations for each small  
657 molecule. **(C)** Prediction of every substance for every concentration across the plate  
658 depending on the ATP level (normalized). Performed for experiment 3, plate01 (non-  
659 confocal), with the CellDeathPred model. For every concentration there are three  
660 replicates.  
661

A

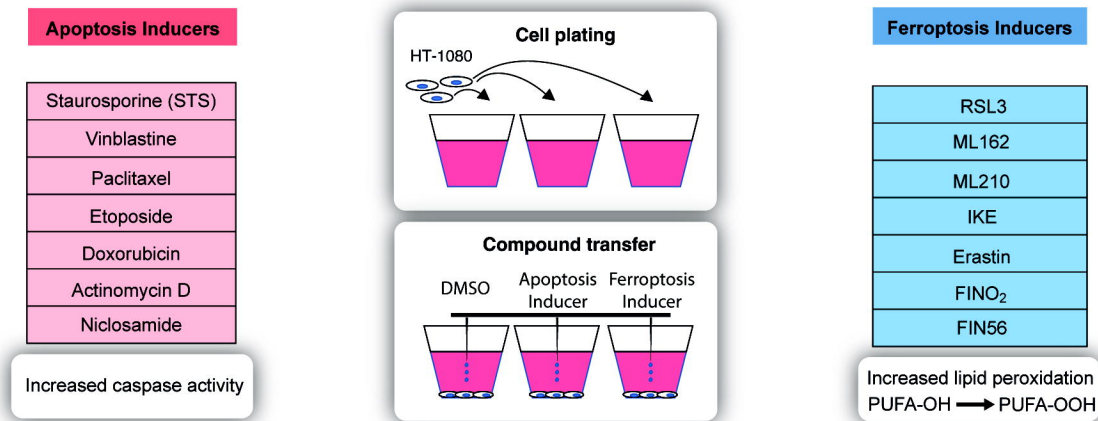

B

**Apoptosis Inducer**

→ 24h → 72h

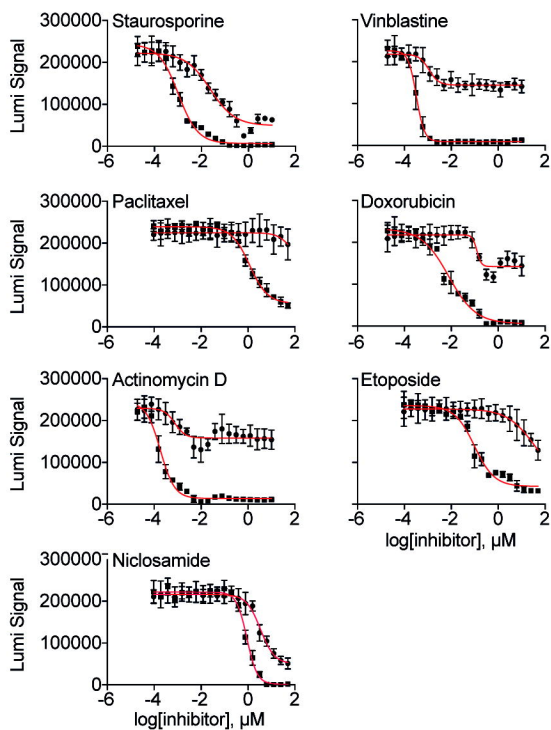

C

**Ferroptosis Inducer**

→ 24h → 72h

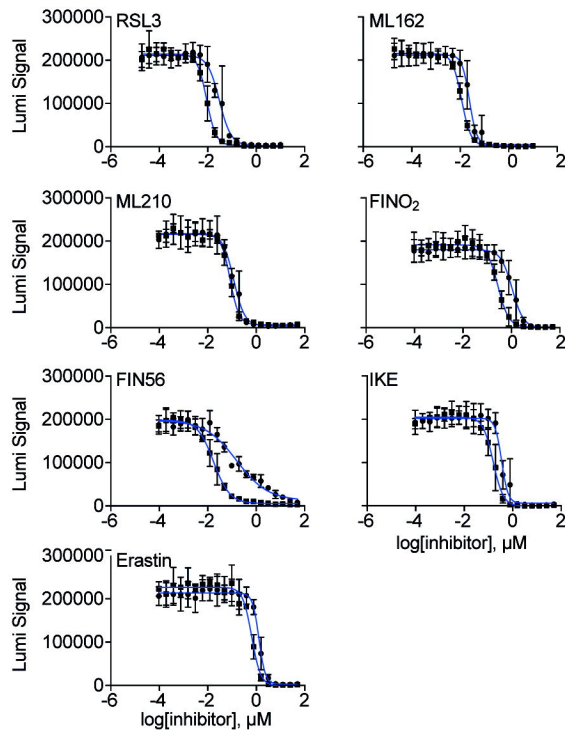

**A****ATP measurement**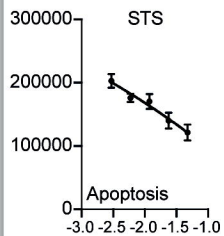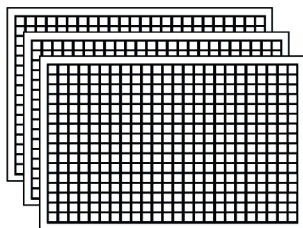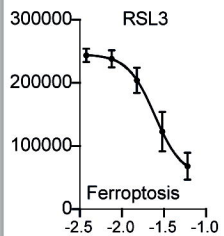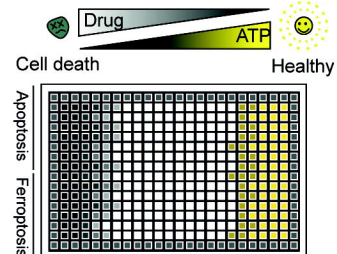**Cell painting**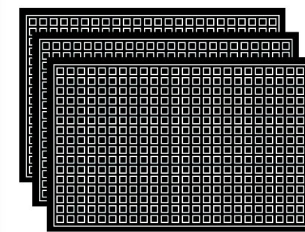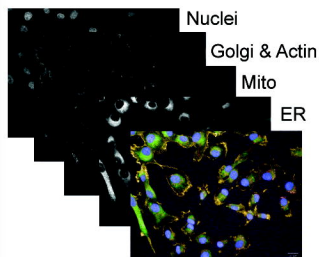

40x confocal

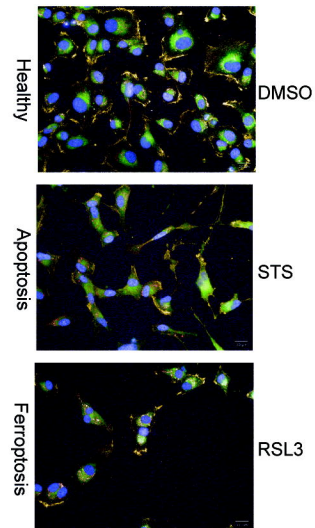**B**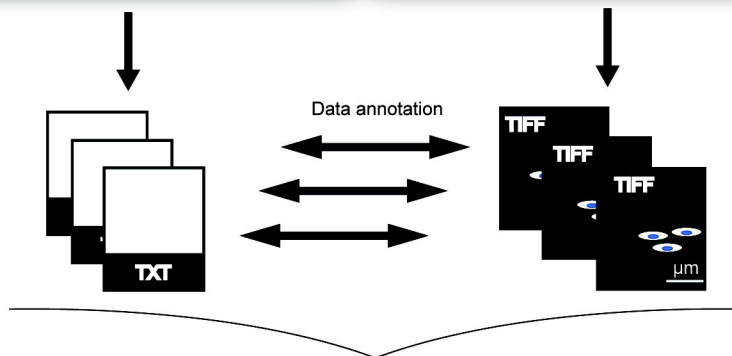

- Quality control and data selection based on ATP levels for DL
- DL model was trained with experiment 1 and 2
- Experiment 3 was used to test the DL model

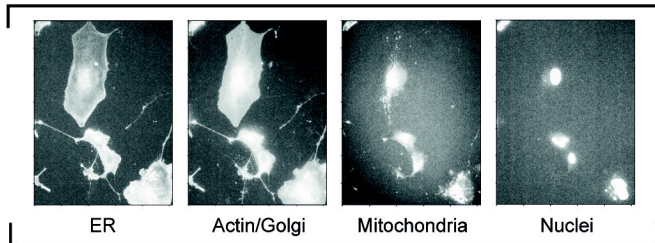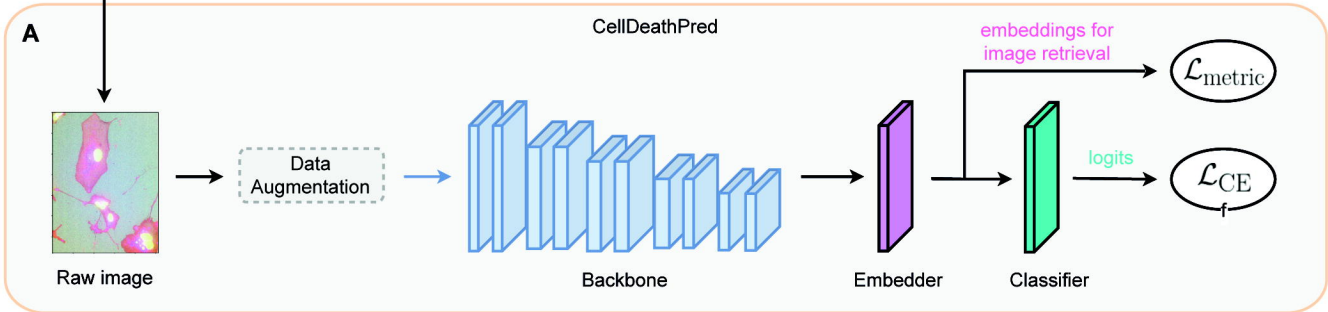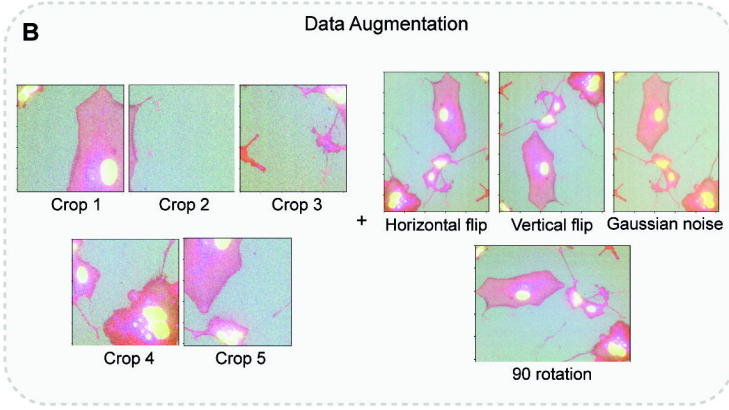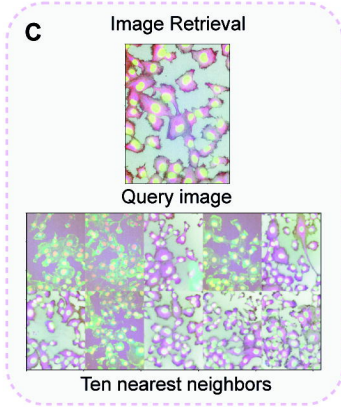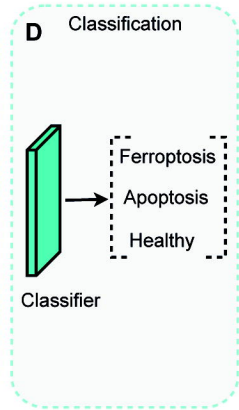

A

Confocal

Non-Confocal

DL

ML

DL

ML

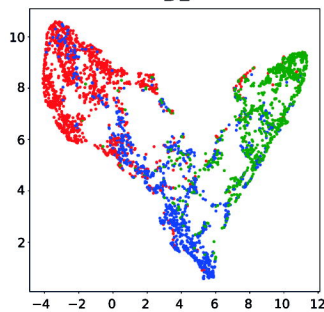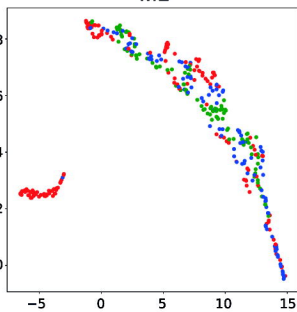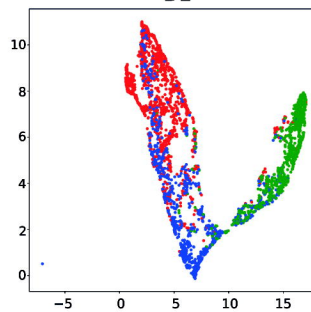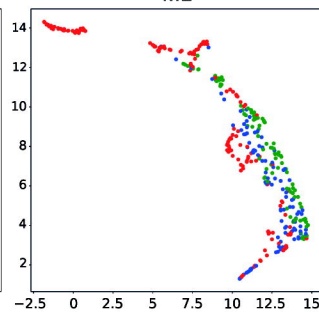

healthy apoptosis ferroptosis

B

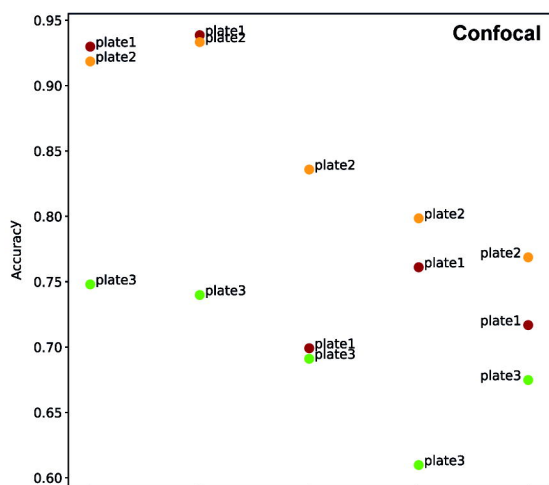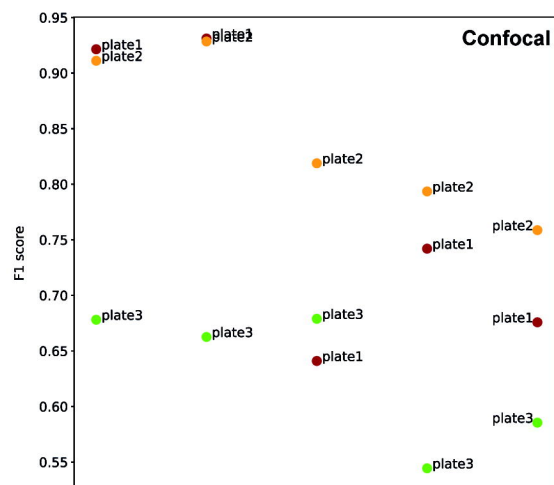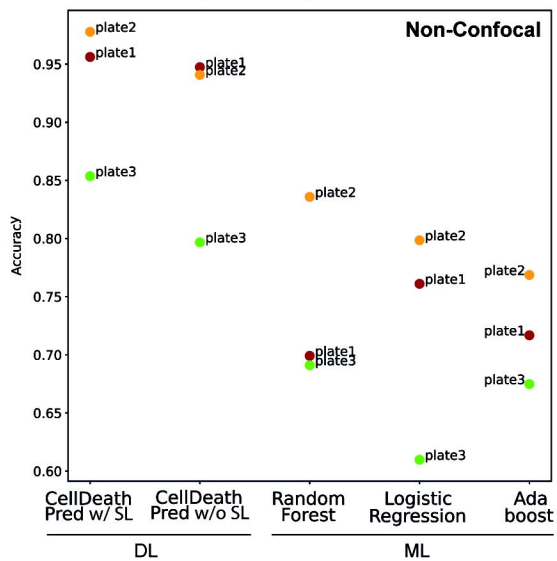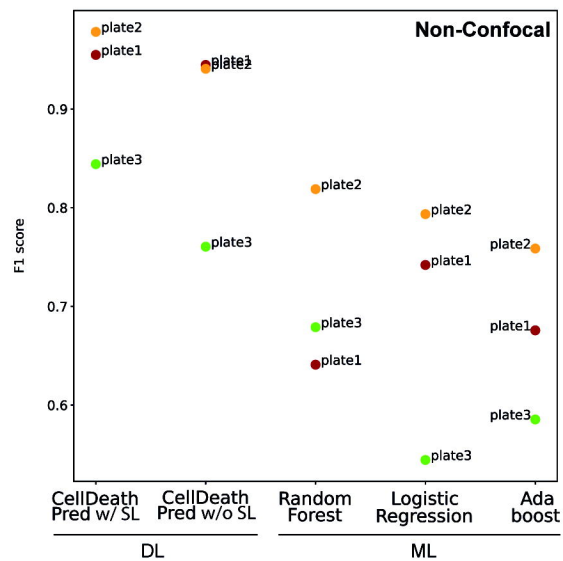

CellDeath Pred w/ SL CellDeath Pred w/o SL Random Forest Logistic Regression Ada boost

CellDeath Pred w/ SL CellDeath Pred w/o SL Random Forest Logistic Regression Ada boost

DL

ML

DL

ML

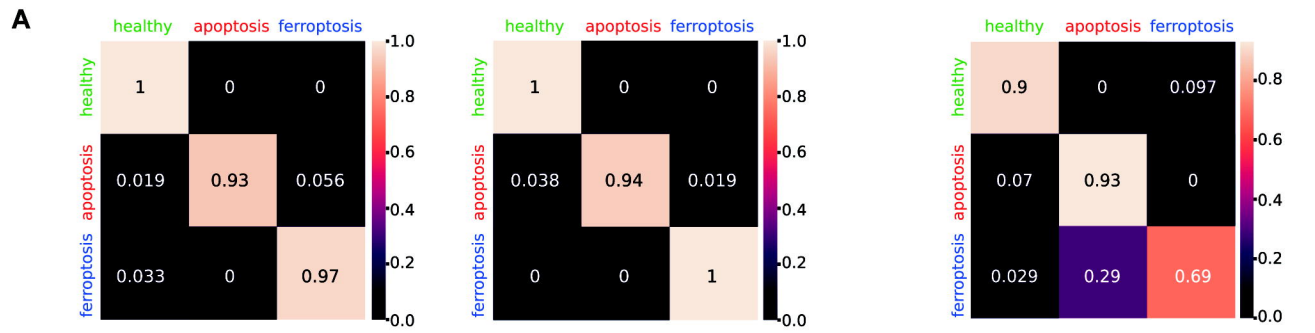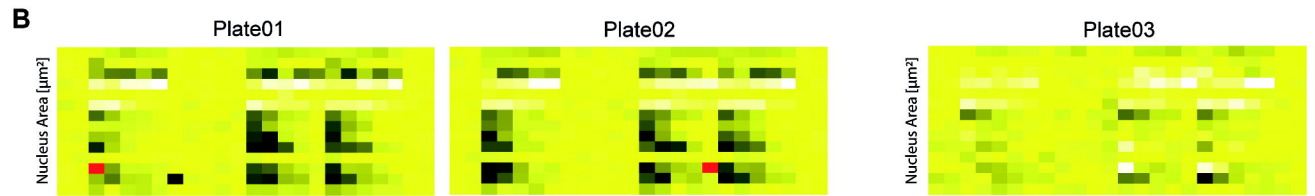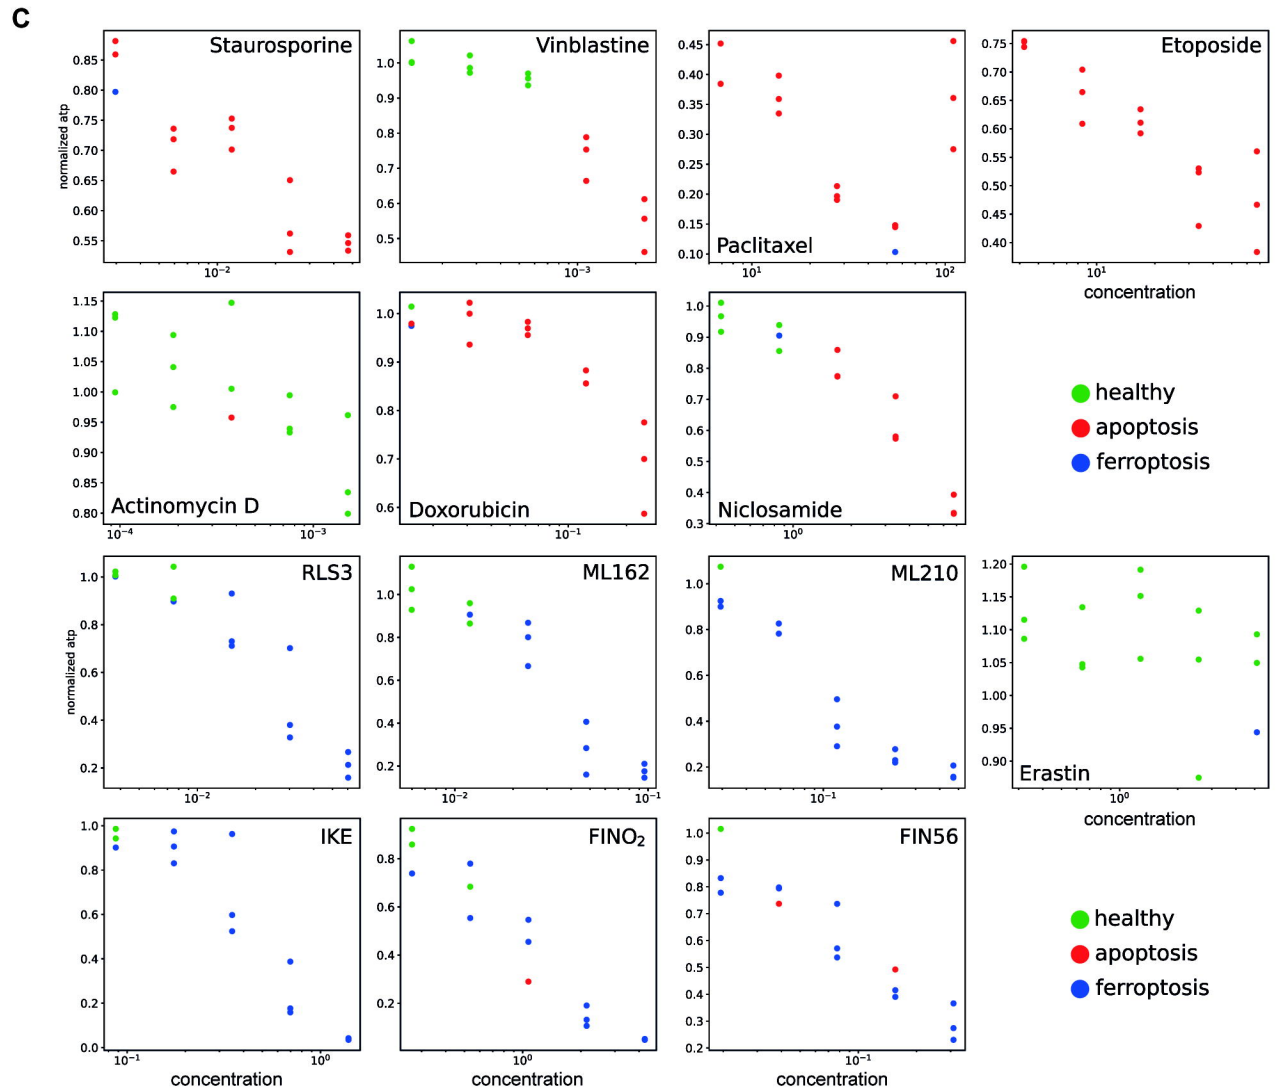

Source: https://www.biorxiv.org/content/10.1101/2023.03.14.532633v1.full.pdf
